# Supplementary material for: Cardiac retinoic acid levels decline in heart failure
Source: PubMed Central journal article supplement (PMC8119182; doi:10.1172/jci.insight.137593), 2021-04-22
Supplement: jciinsight-6-137593-s073.pdf [file jciinsight-6-137593-s073.pdf]

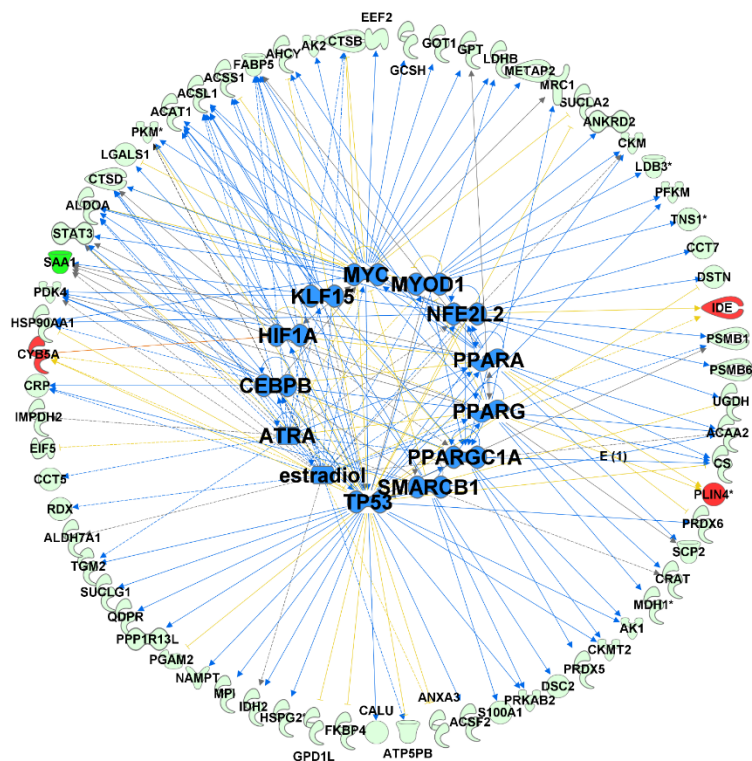

**Figure S1. Network representation of Upstream Regulator Analysis.** Top putative upstream transcriptional regulators (hub) from figure 1E are shown mapped to 60 proteins in cluster 3 for which there is a documented relationship (periphery). green = downregulated protein, red = upregulated protein, blue = inferred inhibition, yellow = relationship is at odds with prediction. 10 of the proteins in cluster 3 have been documented as ATRA-responsive. ATRA is also known to regulate activity or expression of 9 of the 11 TFs in the network hub and therefore could influence expression levels of proteins in cluster 3.

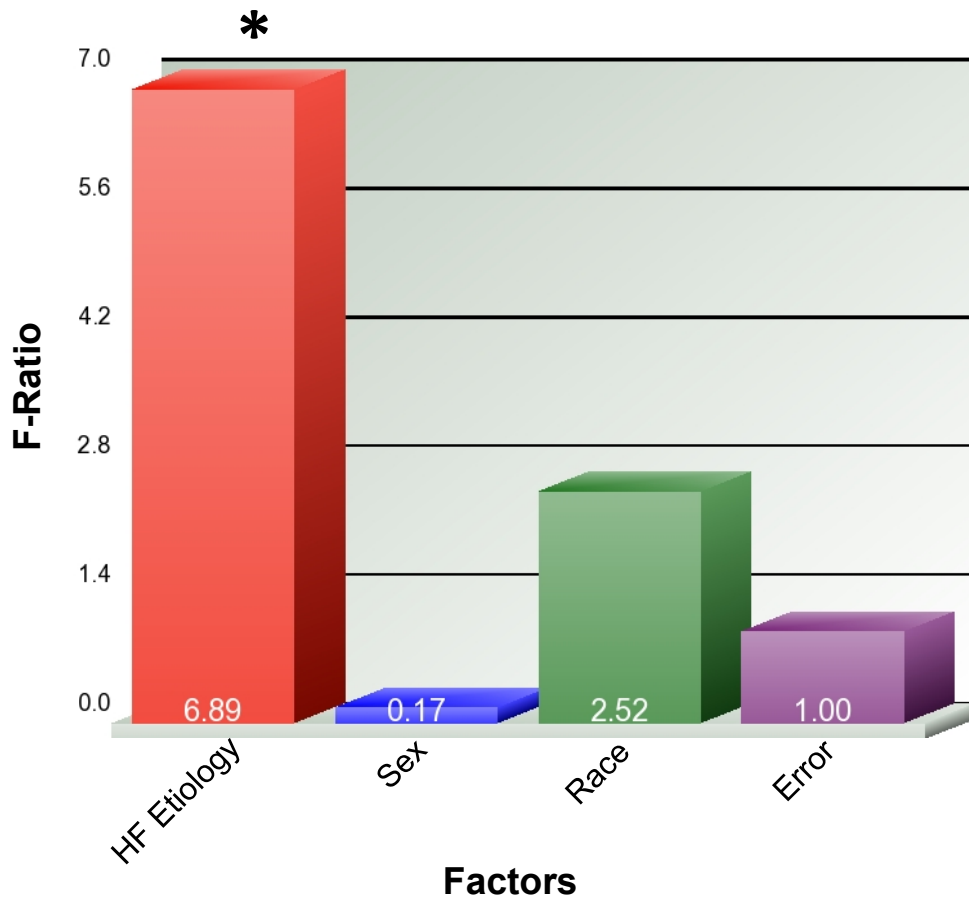

**Figure S2. Contribution of Factors to ATRA variance.** ATRA levels human myectomy samples were analyzed by 3-Way ANOVA to determine which factors, namely, HF diagnosis, sex, or race contributed to ATRA variance (F ratio = between group variability/within group variability). HF diagnosis contributed most to inter-group variance (F=6.89, p=0.019). Neither race nor sex contributed significantly.

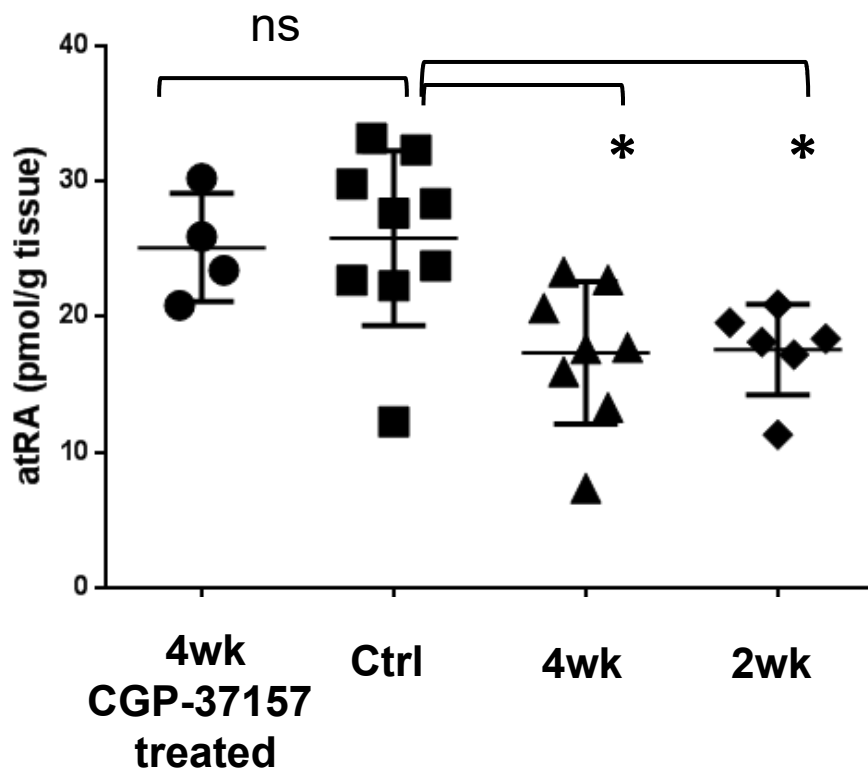

Figure S3. Cardiac ATRA deficit is prevented at 4wks of ACi protocol by cardioprotective treatment with CGP37-157 (ns: not significant at  $p < 0.05$ ).

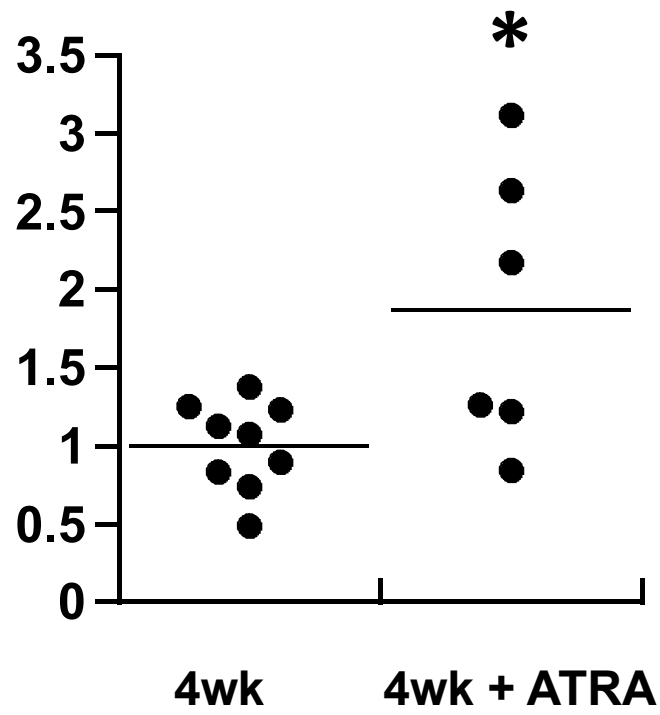

Figure S4. ATRA treatment of guinea pigs subjected to the 4wk aortic constriction protocol raises levels of intracardiac ATRA.

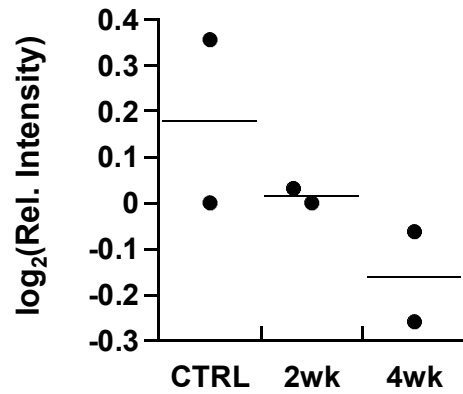

GI Accession: 348573107

retinal dehydrogenase 1-like [*Cavia porcellus*]

n=2, not significant at  $p < 0.05$

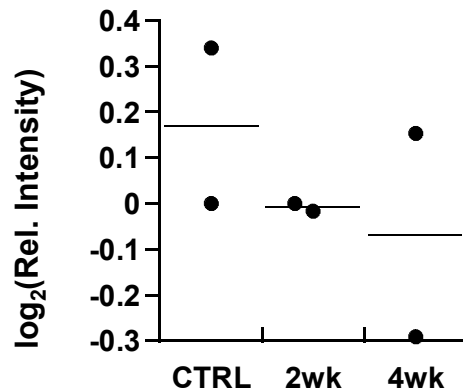

GI Accession:348552582

retinal dehydrogenase 2-like [*Cavia porcellus*]

n=2, not significant at  $p < 0.05$

**Fig. S5. Other retinaldehyde dehydrogenase forms detected in the guinea pig proteome.** Each trended toward modest downregulation though neither met the significance threshold ( $p < 0.05$  by LIMMA).
